# Supplementary material for: Exploring the Role of Guidelines in Contributing to Medication Errors: A Descriptive Analysis of National Patient Safety Incident Data
Source: PubMed Central journal article supplement — Drug Saf. 2024 Feb 2;47(4):389–400. doi: 10.1007/s40264-024-01396-7 (PMC10954937; doi:10.1007/s40264-024-01396-7), 2024-02-02
Supplement: 40264_2024_1396_MOESM1_ESM.pdf [file 40264_2024_1396_MOESM1_ESM.pdf]

## **Drug Safety**

### **Exploring the role of guidelines in contributing to medication errors: a descriptive analysis of national patient safety incident data**

#### **Online Supplementary Information**

Matthew D Jones<sup>1\*</sup> (ORCID 0000-0002-2617-4098), Shaojun Liu<sup>2</sup>, Freyja Powell<sup>1</sup>, Asma Samsor<sup>1</sup>, Felicity Ting Chao Ru<sup>1</sup>, Nikolaos Veliotis<sup>1</sup>, Yin Mei Wong<sup>1</sup>, Bryony Dean Franklin (ORCID 0000-0002-2892-1245)<sup>2,3</sup> and Sara Garfield (ORCID 0000-0002-9980-0520)<sup>2</sup>.

<sup>1</sup>Department of Life Sciences, University of Bath, Bath, UK.

<sup>2</sup>UCL School of Pharmacy, London, UK.

<sup>3</sup>Centre for Medication Safety and Service Quality, Pharmacy Department, Imperial College Healthcare NHS Trust, London, UK

\*Corresponding author:

Department of Life Sciences, University of Bath, Bath, BA2 7AY, UK.

Telephone: +44 1225 383829, E-mail: M.D.Jones@bath.ac.uk

Table S1: Operational definitions used during the pilot coding of 100 reports.

| Reports describing an HTA step discrepancy                  |                                                                                                                                                                                           |                                                                                                                                                                                                                                       |
|-------------------------------------------------------------|-------------------------------------------------------------------------------------------------------------------------------------------------------------------------------------------|---------------------------------------------------------------------------------------------------------------------------------------------------------------------------------------------------------------------------------------|
| HTA step                                                    | Error mode                                                                                                                                                                                | Operational definition                                                                                                                                                                                                                |
| <b>1. Find the right guideline(s)</b>                       | A1: operation took too long                                                                                                                                                               | It took staff an excessively long period of time to find the guideline they needed                                                                                                                                                    |
|                                                             | R1: information not obtained                                                                                                                                                              | Staff looked for a guideline that did exist, but could not find it                                                                                                                                                                    |
|                                                             | R2: wrong information obtained                                                                                                                                                            | Staff found and used the wrong guideline for the situation, e.g. an adult guideline instead of a paediatric guideline                                                                                                                 |
|                                                             | R3: incomplete information obtained                                                                                                                                                       | Staff needed to use more than one guideline for the situation, but did not find all of them                                                                                                                                           |
|                                                             | R4: information not sought                                                                                                                                                                | Staff did not attempt to look for a guideline. Only use this code if there is evidence staff did not attempt to find a guideline. Use C2 if all we know is that staff did something different to the guideline, but we don't know why |
| R5: information not available                               | The organisation does not have a guideline for the condition or patient in question. Different to R1, as the assumption in R1 is that the guideline existed but could not be found        |                                                                                                                                                                                                                                       |
| <b>2. Find all relevant information within guideline(s)</b> | A1: operation took too long                                                                                                                                                               | Staff found the right guideline, but it took them an excessively long period of time to find the information they needed within it                                                                                                    |
|                                                             | R1: information not obtained                                                                                                                                                              | Staff found the right guideline but could not find the information they needed within it                                                                                                                                              |
|                                                             | R2: wrong information obtained                                                                                                                                                            | Staff found the right guideline, but then found and used the wrong information within it, e.g. use of an adult dose instead of a child dose                                                                                           |
|                                                             | R3: incomplete information obtained                                                                                                                                                       | Staff found the right guideline and then needed to use more than one piece of information from it. They found some of these pieces of information, but not all of them                                                                |
|                                                             | R4: information not sought                                                                                                                                                                | Staff found the right guideline, but then didn't try to find the information they needed within it                                                                                                                                    |
| R5: information not available                               | Staff found an appropriate guideline for the patient's situation, but it did not include the information they needed, e.g. guideline did not give dose for patients with renal impairment |                                                                                                                                                                                                                                       |
| <b>3. Read and correctly use all relevant information</b>   | A1: operation took too long                                                                                                                                                               | Staff found the right information in the right guideline, but it took an excessively long period of time to understand it                                                                                                             |
|                                                             | R1: information not obtained                                                                                                                                                              | Staff found the right information in the right guideline. However, after reading the information they did not understand what action they should take and were aware that they did not know what to do                                |
|                                                             | R2: wrong information obtained                                                                                                                                                            | Staff found the right information in the right guideline. However, while they thought they understood this information, they did not understand it and so planned an incorrect action                                                 |
|                                                             | R3: incomplete information obtained                                                                                                                                                       | Staff found the right information in the right guideline and understood some information but not all of it                                                                                                                            |

---

|                            |                                                                                                                       |
|----------------------------|-----------------------------------------------------------------------------------------------------------------------|
| R4: information not sought | Staff found the right information in the right guideline, but did not try to understand it or apply it to the patient |
|----------------------------|-----------------------------------------------------------------------------------------------------------------------|

---

---

**Reports not describing an HTA step discrepancy**

---

| <b>Description</b>                                                                                    | <b>Operational definition</b>                                                                                                                                                                               |
|-------------------------------------------------------------------------------------------------------|-------------------------------------------------------------------------------------------------------------------------------------------------------------------------------------------------------------|
| Guideline not followed for reason unrelated to the process of retrieving information from a guideline | An appropriate guideline was available, but was not followed for a reason unrelated to difficulties finding or understanding the guideline, e.g. instructed to do something different by a senior colleague |
| Guideline not followed; reason unknown                                                                | An appropriate guideline was available, but was not followed for an unknown reason                                                                                                                          |
| Report not related to guideline use                                                                   | The use or lack of use of guidelines did not contribute to the incident                                                                                                                                     |
| Insufficient information to determine if guideline followed                                           | The report lacks sufficient detail to determine whether guideline use contributed to the incident                                                                                                           |

---

Table S2: Operational definitions amended after pilot coding and used during coding of remaining reports. Additions from the definitions used during pilot coding (Table S1) are highlighted in yellow.

| <b>Definition of a guideline</b>                                                                                                                                                                                                                                                                                   |                                     |                                                                                                                                                                                                                                       |
|--------------------------------------------------------------------------------------------------------------------------------------------------------------------------------------------------------------------------------------------------------------------------------------------------------------------|-------------------------------------|---------------------------------------------------------------------------------------------------------------------------------------------------------------------------------------------------------------------------------------|
| In this study, a 'guideline' is defined as meeting both the following criteria:                                                                                                                                                                                                                                    |                                     |                                                                                                                                                                                                                                       |
| i) 'Clinical Practice Guidelines' as defined by the Institute of Medicine: "statements that include recommendations intended to optimize patient care" - i.e. guidelines describe best practice to inform clinical decisions, they are not policies or procedures that describe how a task must be undertaken; AND |                                     |                                                                                                                                                                                                                                       |
| ii) a document that provides information on the prescribing, administration or monitoring of a medicine                                                                                                                                                                                                            |                                     |                                                                                                                                                                                                                                       |
| <b>Application of the coding system</b>                                                                                                                                                                                                                                                                            |                                     |                                                                                                                                                                                                                                       |
| When applying the following classification system:                                                                                                                                                                                                                                                                 |                                     |                                                                                                                                                                                                                                       |
| i) only select an HTA code when there is positive evidence to support this in the NRLS report. Where there is not positive evidence, select a non-HTA step discrepancy code                                                                                                                                        |                                     |                                                                                                                                                                                                                                       |
| ii) where a series of mistakes, slips or lapses have contributed to an error, select the code relevant to the first one                                                                                                                                                                                            |                                     |                                                                                                                                                                                                                                       |
| <b>Reports describing an HTA step discrepancy</b>                                                                                                                                                                                                                                                                  |                                     |                                                                                                                                                                                                                                       |
| <b>HTA step</b>                                                                                                                                                                                                                                                                                                    | <b>Error mode</b>                   | <b>Operational definition</b>                                                                                                                                                                                                         |
| <b>1. Find the right guideline(s)</b>                                                                                                                                                                                                                                                                              | A1: operation took too long         | It took staff an excessively long period of time to find the guideline they needed                                                                                                                                                    |
|                                                                                                                                                                                                                                                                                                                    | R1: information not obtained        | Staff looked for a guideline that did exist, but could not find it                                                                                                                                                                    |
|                                                                                                                                                                                                                                                                                                                    | R2: wrong information obtained      | Staff found and used the wrong guideline for the situation, e.g. an adult guideline instead of a paediatric guideline, or an out-of-date guideline when an up-to-date guideline was available                                         |
|                                                                                                                                                                                                                                                                                                                    | R3: incomplete information obtained | Staff needed to use more than one guideline for the situation, but did not find all of them                                                                                                                                           |
|                                                                                                                                                                                                                                                                                                                    | R4: information not sought          | Staff did not attempt to look for a guideline. Only use this code if there is evidence staff did not attempt to find a guideline. Use C2 if all we know is that staff did something different to the guideline, but we don't know why |
|                                                                                                                                                                                                                                                                                                                    | R5: information not available       | The organisation does not have a guideline for the condition or patient in question. Different to R1, as the assumption in R1 is that the guideline existed but could not be found                                                    |
| <b>2. Find all relevant information</b>                                                                                                                                                                                                                                                                            | A1: operation took too long         | Staff found the right guideline, but it took them an excessively long period of time to find the information they needed within it                                                                                                    |
|                                                                                                                                                                                                                                                                                                                    | R1: information not obtained        | Staff found the right guideline but could not find the information they needed within it                                                                                                                                              |
|                                                                                                                                                                                                                                                                                                                    | R2: wrong information obtained      | Staff found the right guideline, but then found and used the wrong information within it, e.g. use of an adult dose instead of a child dose                                                                                           |

|                                                           |                                     |                                                                                                                                                                                                        |
|-----------------------------------------------------------|-------------------------------------|--------------------------------------------------------------------------------------------------------------------------------------------------------------------------------------------------------|
| <b>within guideline(s)</b>                                | R3: incomplete information obtained | Staff found the right guideline and then needed to use more than one piece of information from it. They found some of these pieces of information, but not all of them                                 |
|                                                           | R4: information not sought          | Staff found the right guideline, but then didn't try to find the information they needed within it                                                                                                     |
|                                                           | R5: information not available       | Staff found an appropriate guideline for the patient's situation, but it did not include the information they needed, e.g. guideline did not give dose for patients with renal impairment              |
| <b>3. Read and correctly use all relevant information</b> | A1: operation took too long         | Staff found the right information in the right guideline, but it took an excessively long period of time to understand it                                                                              |
|                                                           | R1: information not obtained        | Staff found the right information in the right guideline. However, after reading the information they did not understand what action they should take and were aware that they did not know what to do |
|                                                           | R2: wrong information obtained      | Staff found the right information in the right guideline. However, while they thought they understood this information, they did not understand it and so planned an incorrect action                  |
|                                                           | R3: incomplete information obtained | Staff found the right information in the right guideline and understood some information but not all of it                                                                                             |
|                                                           | R4: information not sought          | Staff found the right information in the right guideline, but did not try to understand it or apply it to the patient                                                                                  |

#### Reports not describing an HTA step discrepancy

| Description                                                                                           | Operational definition                                                                                                                                                                                      |
|-------------------------------------------------------------------------------------------------------|-------------------------------------------------------------------------------------------------------------------------------------------------------------------------------------------------------------|
| Guideline not followed for reason unrelated to the process of retrieving information from a guideline | An appropriate guideline was available, but was not followed for a reason unrelated to difficulties finding or understanding the guideline, e.g. instructed to do something different by a senior colleague |
| Guideline not followed; reason unknown                                                                | An appropriate guideline was available, but was not followed for an unknown reason                                                                                                                          |
| Guideline content incorrect or out-of-date                                                            | Information contained in the appropriate guideline was incorrect or the advice contained in the current version of the guidelines is now out-of-date. Incomplete guidelines should be coded 2R5             |
| Report not related to guideline use                                                                   | The use or lack of use of guidelines did not contribute to the incident                                                                                                                                     |
| Insufficient information to determine if guideline followed                                           | The report lacks sufficient detail to determine whether guideline use contributed to the incident                                                                                                           |
| Does not relate to a medication incident                                                              | The report describes an incident that does not relate to the use of medication                                                                                                                              |

Table S3: the number of HTA step discrepancies associated various types of medication error.

| HTA step                                                       | Adverse drug reaction | Contra-indication | Expired medicine | Omitted medicine | Patient allergic | Wrong/unclear dose or strength | Wrong formulation | Wrong frequency | Wrong medicine | Wrong method of preparation | Wrong patient | Wrong/omitted patient directions | Wrong quantity | Wrong route | Other or unknown |
|----------------------------------------------------------------|-----------------------|-------------------|------------------|------------------|------------------|--------------------------------|-------------------|-----------------|----------------|-----------------------------|---------------|----------------------------------|----------------|-------------|------------------|
| Step 1 – find the right guideline(s)                           | 5                     | 14                | 2                | 23               | 0                | 75                             | 10                | 27              | 18             | 18                          | 4             | 1                                | 28             | 8           | 67               |
| Step 2 – find all relevant information within the guideline(s) | 3                     | 19                | 0                | 13               | 2                | 53                             | 5                 | 9               | 9              | 8                           | 0             | 2                                | 11             | 6           | 26               |
| Step 3 – read and correctly use all relevant information       | 1                     | 4                 | 0                | 14               | 0                | 56                             | 11                | 18              | 4              | 6                           | 2             | 1                                | 21             | 3           | 35               |
| <b>Total</b>                                                   | <b>9</b>              | <b>37</b>         | <b>2</b>         | <b>50</b>        | <b>2</b>         | <b>184</b>                     | <b>26</b>         | <b>54</b>       | <b>31</b>      | <b>32</b>                   | <b>6</b>      | <b>4</b>                         | <b>60</b>      | <b>17</b>   | <b>128</b>       |

HTA = hierarchical task analysis

Table S4: medicines associated HTA step discrepancies.

| Medicine                        | Number of associated HTA step discrepancies |
|---------------------------------|---------------------------------------------|
| Gentamicin                      | 38                                          |
| Insulins                        | 32                                          |
| Heparin, vancomycin             | 19                                          |
| Paracetamol                     | 18                                          |
| Dalteparin                      | 17                                          |
| Enoxaparin                      | 16                                          |
| Ceftriaxone                     | 14                                          |
| Amiodarone, morphine            | 13                                          |
| Parenteral nutrition            | 12                                          |
| Potassium chloride, teicoplanin | 11                                          |

|                                                                                                                                                                                                                                                                                                                                                                                                                                                                                                                                                                                                                                                                                                                                                                                                                                                                                                                                                                                                                                                                                                                                                                                                                                                                                                                                                                                                                                                                                                                                                                                                                                                                                                                                                                                     |    |
|-------------------------------------------------------------------------------------------------------------------------------------------------------------------------------------------------------------------------------------------------------------------------------------------------------------------------------------------------------------------------------------------------------------------------------------------------------------------------------------------------------------------------------------------------------------------------------------------------------------------------------------------------------------------------------------------------------------------------------------------------------------------------------------------------------------------------------------------------------------------------------------------------------------------------------------------------------------------------------------------------------------------------------------------------------------------------------------------------------------------------------------------------------------------------------------------------------------------------------------------------------------------------------------------------------------------------------------------------------------------------------------------------------------------------------------------------------------------------------------------------------------------------------------------------------------------------------------------------------------------------------------------------------------------------------------------------------------------------------------------------------------------------------------|----|
| Glucose                                                                                                                                                                                                                                                                                                                                                                                                                                                                                                                                                                                                                                                                                                                                                                                                                                                                                                                                                                                                                                                                                                                                                                                                                                                                                                                                                                                                                                                                                                                                                                                                                                                                                                                                                                             | 10 |
| Aspirin                                                                                                                                                                                                                                                                                                                                                                                                                                                                                                                                                                                                                                                                                                                                                                                                                                                                                                                                                                                                                                                                                                                                                                                                                                                                                                                                                                                                                                                                                                                                                                                                                                                                                                                                                                             | 9  |
| Phenytoin, piperacillin and tazobactam                                                                                                                                                                                                                                                                                                                                                                                                                                                                                                                                                                                                                                                                                                                                                                                                                                                                                                                                                                                                                                                                                                                                                                                                                                                                                                                                                                                                                                                                                                                                                                                                                                                                                                                                              | 8  |
| Cefotaxime, dinoprostone, human normal immunoglobulin, warfarin                                                                                                                                                                                                                                                                                                                                                                                                                                                                                                                                                                                                                                                                                                                                                                                                                                                                                                                                                                                                                                                                                                                                                                                                                                                                                                                                                                                                                                                                                                                                                                                                                                                                                                                     | 7  |
| Acetylcysteine, adrenaline, amoxicillin, hydrocortisone, labetalol, magnesium sulphate, rivaroxaban                                                                                                                                                                                                                                                                                                                                                                                                                                                                                                                                                                                                                                                                                                                                                                                                                                                                                                                                                                                                                                                                                                                                                                                                                                                                                                                                                                                                                                                                                                                                                                                                                                                                                 | 6  |
| Benzylpenicillin, co-trimoxazole, methadone, sodium bicarbonate, tinzaparin                                                                                                                                                                                                                                                                                                                                                                                                                                                                                                                                                                                                                                                                                                                                                                                                                                                                                                                                                                                                                                                                                                                                                                                                                                                                                                                                                                                                                                                                                                                                                                                                                                                                                                         | 5  |
| Aciclovir, amikacin, clindamycin, fentanyl, IV fluids, midazolam, naloxone, octreotide, phytomenadione, salbutamol, sodium chloride                                                                                                                                                                                                                                                                                                                                                                                                                                                                                                                                                                                                                                                                                                                                                                                                                                                                                                                                                                                                                                                                                                                                                                                                                                                                                                                                                                                                                                                                                                                                                                                                                                                 | 4  |
| Antibiotics, calcium gluconate, ciprofloxacin, desmopressin, digoxin, ferric carboxymaltose, folic acid, glyceryl trinitrate, human albumin, hydralazine, levomepromazine, meropenem, metoclopramide, omeprazole, oxycodone, phosphates, tobramycin, zoledronic acid                                                                                                                                                                                                                                                                                                                                                                                                                                                                                                                                                                                                                                                                                                                                                                                                                                                                                                                                                                                                                                                                                                                                                                                                                                                                                                                                                                                                                                                                                                                | 3  |
| Aminophylline, amphotericin, artemether and lumefantrine, carboplatin, caspofungin, cefuroxime, clopidogrel, dexamethasone, dexmedetomidine, diamorphine, diazepam, diclofenac, doxycycline, enteral feed, flucloxacillin, Hartmann's solution, hepatitis b immunoglobulin, hyoscine butylbromide, influenza vaccine, levonorgestrel, lidocaine, lorazepam, methylprednisolone, metoprolol, misoprostol, nivolumab, ondansetron, pantoprazole, phenobarbital, posaconazole, pregabalin, ranitidine, risperidone, romiplostin, tranexamic acid, vitamin k, voriconazole                                                                                                                                                                                                                                                                                                                                                                                                                                                                                                                                                                                                                                                                                                                                                                                                                                                                                                                                                                                                                                                                                                                                                                                                              | 2  |
| Alemtuzumab, alfentanil, alglucosidase alfa, alimemazine, alteplase, anti-d immunoglobulin, antithymocyte immunoglobulin (rabbit), apixaban, aprotinin, argatroban, aripiprazole, atenolol, atorvastatin, azithromycin, aztreonam, baricitinib, Beriplex, bleomycin, calcium chloride, calcium folinate, captopril, cefalexin, ceftazidime, cetirizine, chemotherapy, chloramphenicol, ciclosporin, co-amoxiclav, codeine, colistimethate, cyclophosphamide, dabigatran, daptomycin, daunorubicin, demeclocycline, dihydrocodeine, dinutuximab, docetaxel, dopamine, edoxaban, epoprostenol, ertapenem, erythromycin, ethambutol, felodipine, ferric derisomaltose, filgrastim, flumazenil, flupentixol, fondaparinux, fosfomycin, furosemide, gabapentin, Gelofusine, high purity factor VIII, hydromorphone, hydroxocobalamin, ibuprofen, ipilimumab, ipratropium, iron sucrose, isoprenaline, isosorbide dinitrate, ketamine, ketoralac, LAT gel, levofloxacin, levosimendan, linezolid, liothyronine, lisinopril, lithium, mannitol, meptazinol, mesalazine, methotrexate, metronidazole, mexiletine, monteleukast, nerve block, nifedipine, nitrofurantoin, noradrenaline, Nutrison energy, nystatin, ofloxacin, oxytocin, paliperidone, palivizumab, pamidronate, pentoxifylline, Pepti-Junior, Plasma-Lyte 148, prochlorperazine, prokinetics, promethazine, propranolol, quetiapine, raltegravir, rituximab, salbutamol and ipratropium, sarilumab, saxagliptin, sildenafil, sodium dihydrogen phosphate, sodium nitropursside, sodium thiosulphate, somatropin, tacrolimus, thickening products, tocilizumab, urokinase, ustekinumab, valganciclovir, vasopressin, vecuronium, vincristine, vitamin D, Voncento, water for injections, zidovudine, zuclopentixol decanoate | 1  |

Some discrepancies were associated with more than one medicine.
